# Supplementary material
Source: PubMed Central journal article supplement (PMC9376739)
Supplement: NIHMS1768197-supplement-Multimedia_component_2_.pdf [file NIHMS1768197-supplement-Multimedia_component_2_.pdf]

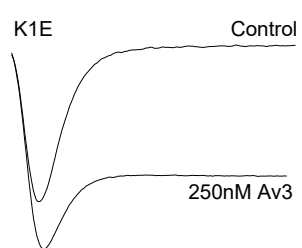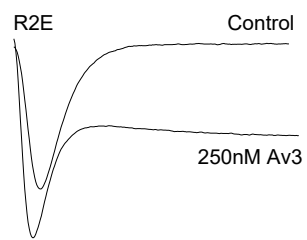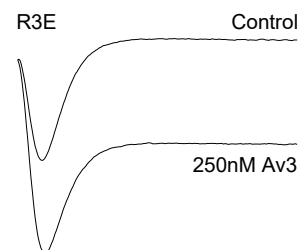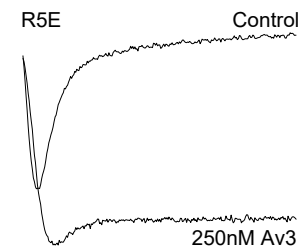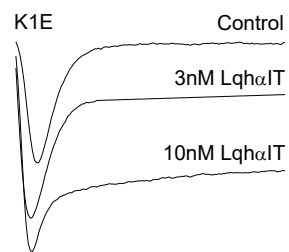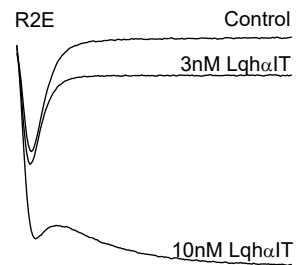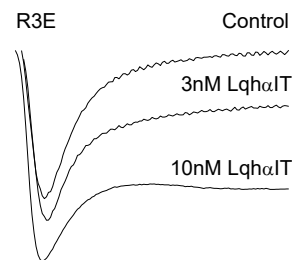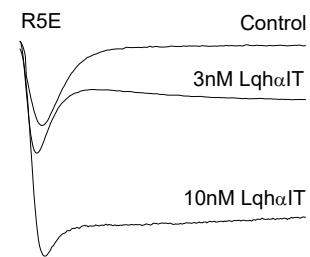

Figure S1A

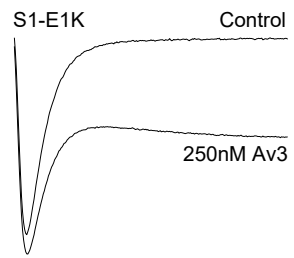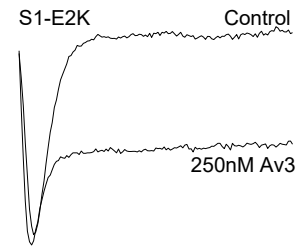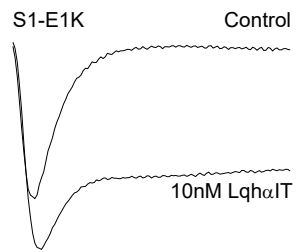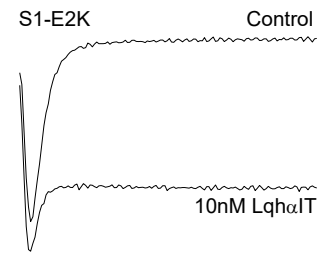

Figure S1B

|                                  |      |   |   |   |   |   |   |   |   |   |   |   |   |   |   |   |   |   |   |   |   |   |   |   |   |   |   |   |   |   |   |   |   |   |   |   |   |   |   |   |   |   |   |   |   |   |   |   |   |   |   |    |      |
|----------------------------------|------|---|---|---|---|---|---|---|---|---|---|---|---|---|---|---|---|---|---|---|---|---|---|---|---|---|---|---|---|---|---|---|---|---|---|---|---|---|---|---|---|---|---|---|---|---|---|---|---|---|---|----|------|
| <b>Conservation</b>              |      |   |   |   |   |   |   |   |   |   |   |   |   |   |   |   |   |   |   |   |   |   |   |   |   |   |   |   |   |   |   |   |   |   |   |   |   |   |   |   |   |   |   |   |   |   |   |   |   |   |   |    |      |
| <b>NaChBac</b>                   | 19   | I | V | N | H | R | A | F | T | F | T | V | I | A | L | I | L | F | N | A | L | I | V | G | I | E | - | - | - | T | Y | P | R | I | Y | A | D | H | K | W | L | F | Y | R | I | D | L | V | L | L | W | 65 |      |
| <b>NavAb</b>                     | 8    | I | V | E | S | S | F | F | T | K | F | I | I | Y | L | I | V | L | N | G | I | T | M | G | L | E | T | S | K | T | F | M | Q | S | F | G | V | Y | T | T | L | F | - | - | - | N | Q | I | V | I | T | 54 |      |
| <b>Nav1.4-HS DIII</b>            | 1027 | I | V | E | H | N | W | F | E | T | F | I | V | F | M | I | L | L | S | S | G | A | L | A | F | E | - | - | - | D | I | Y | I | E | Q | R | R | V | I | R | T | I | L | E | Y | A | D | K | V | F | T | Y  | 1074 |
| <b>Nav1.7-HS DIII</b>            | 1088 | I | V | E | H | S | W | F | E | S | F | I | V | L | M | I | L | L | S | S | G | A | L | A | F | E | - | - | - | D | I | Y | I | E | R | K | K | T | I | K | I | I | L | E | Y | A | D | K | I | F | T | Y  | 1135 |
| <b>Nav1.2-Rat DIII</b>           | 1204 | I | V | E | H | N | W | F | E | T | F | I | V | F | M | I | L | L | S | S | G | A | L | A | F | E | - | - | - | D | I | Y | I | E | Q | R | K | T | I | K | T | M | L | E | Y | A | D | K | V | F | T | Y  | 1251 |
| <b>BgNa<sub>v</sub>1-1a DIII</b> | 1266 | L | I | E | N | K | Y | F | E | T | A | V | I | T | M | I | L | L | S | S | L | A | L | A | L | E | - | - | - | D | V | H | L | P | H | R | P | I | L | Q | D | I | L | Y | Y | M | D | R | I | F | T | V  | 1313 |

S1

|                                  |      |   |   |   |   |   |   |   |   |   |   |   |   |   |   |   |   |   |   |   |   |   |   |   |   |   |   |   |   |   |   |   |   |   |   |   |   |   |   |   |   |   |   |   |   |   |   |   |   |   |   |      |     |
|----------------------------------|------|---|---|---|---|---|---|---|---|---|---|---|---|---|---|---|---|---|---|---|---|---|---|---|---|---|---|---|---|---|---|---|---|---|---|---|---|---|---|---|---|---|---|---|---|---|---|---|---|---|---|------|-----|
| <b>Conservation</b>              |      |   |   |   |   |   |   |   |   |   |   |   |   |   |   |   |   |   |   |   |   |   |   |   |   |   |   |   |   |   |   |   |   |   |   |   |   |   |   |   |   |   |   |   |   |   |   |   |   |   |   |      |     |
| <b>NaChBac</b>                   | 66   | I | F | T | I | E | I | A | M | R | F | L | A | S | N | P | K | S | A | F | F | R | S | S | W | N | W | F | D | F | L | I | V | A | A | G | H | I | - | - | - | - | - | - | - | - | - | F | A | G | A | Q    | 107 |
| <b>NavAb</b>                     | 55   | I | F | T | I | E | I | I | L | R | I | - | - | Y | V | H | R | I | S | F | F | K | D | P | W | S | L | F | D | F | F | V | V | A | I | S | L | V | - | - | - | - | - | - | - | - | - | P | T | S | S | 93   |     |
| <b>Nav1.4-HS DIII</b>            | 1075 | I | F | I | M | E | M | L | L | K | W | V | A | Y | G | F | K | V | - | Y | F | T | N | A | W | C | W | L | D | F | L | I | V | D | V | S | I | I | S | L | V | A | N | W | L | G | Y | S | E | L | G | 1123 |     |
| <b>Nav1.7-HS DIII</b>            | 1136 | I | F | I | L | E | M | L | L | K | W | I | A | Y | G | Y | K | T | - | Y | F | T | N | A | W | C | W | L | D | F | L | I | V | D | V | S | L | V | T | L | V | A | N | T | L | G | Y | S | D | L | G | 1184 |     |
| <b>Nav1.2-Rat DIII</b>           | 1252 | I | F | I | L | E | M | L | L | K | W | V | A | Y | G | F | Q | M | - | Y | F | T | N | A | W | C | W | L | D | F | L | I | V | D | V | S | L | V | S | L | T | A | N | A | L | G | Y | S | E | L | G | 1300 |     |
| <b>BgNa<sub>v</sub>1-1a DIII</b> | 1314 | I | F | F | I | E | M | L | I | K | W | L | A | L | G | F | K | K | - | Y | F | T | N | A | W | C | W | L | D | F | I | I | V | M | V | S | L | I | N | F | V | A | S | L | V | G | A | G | G | I | Q | 1362 |     |

S2

S3

|                                  |      |   |   |   |   |   |   |   |   |   |   |   |   |   |   |   |   |   |   |   |   |      |
|----------------------------------|------|---|---|---|---|---|---|---|---|---|---|---|---|---|---|---|---|---|---|---|---|------|
| <b>Conservation</b>              |      |   |   |   |   |   |   |   |   |   |   |   |   |   |   |   |   |   |   |   |   |      |
| <b>NaChBac</b>                   | 108  | F | V | T | V | L | R | I | L | R | V | L | R | V | L | R | A | I | S | V | V | 127  |
| <b>NavAb</b>                     | 94   | G | F | E | I | L | R | V | L | R | V | L | R | L | F | R | L | V | T | A | V | 113  |
| <b>Nav1.4-HS DIII</b>            | 1124 | P | I | K | S | L | R | T | L | R | A | L | R | P | L | R | A | L | S | R | F | 1143 |
| <b>Nav1.7-HS DIII</b>            | 1185 | P | I | K | S | L | R | T | L | R | A | L | R | P | L | R | A | L | S | R | F | 1204 |
| <b>Nav1.2-Rat DIII</b>           | 1301 | A | I | K | S | L | R | T | L | R | A | L | R | P | L | R | A | L | S | R | F | 1320 |
| <b>BgNa<sub>v</sub>1-1a DIII</b> | 1363 | A | F | K | T | M | R | T | L | R | A | L | R | P | L | R | A | M | S | R | M | 1382 |

S4

Figure S2A

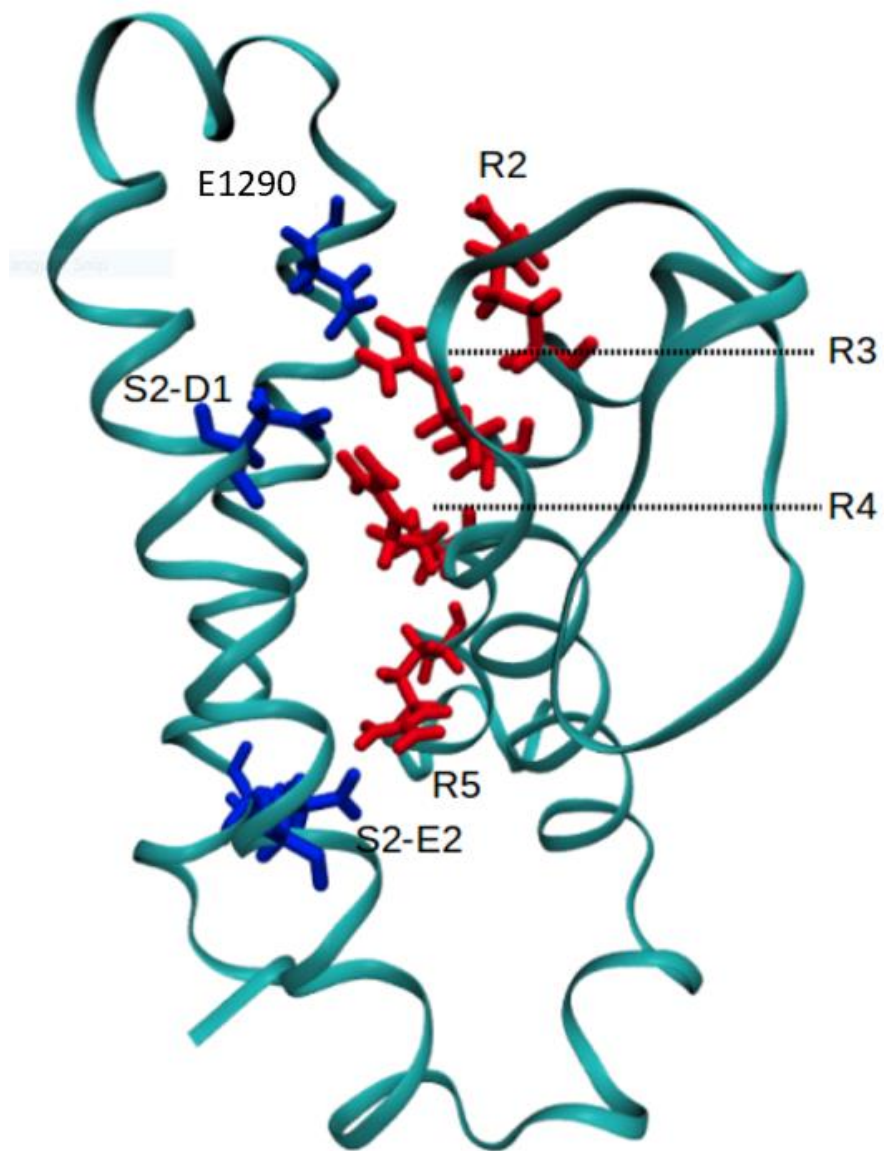

Figure S2B

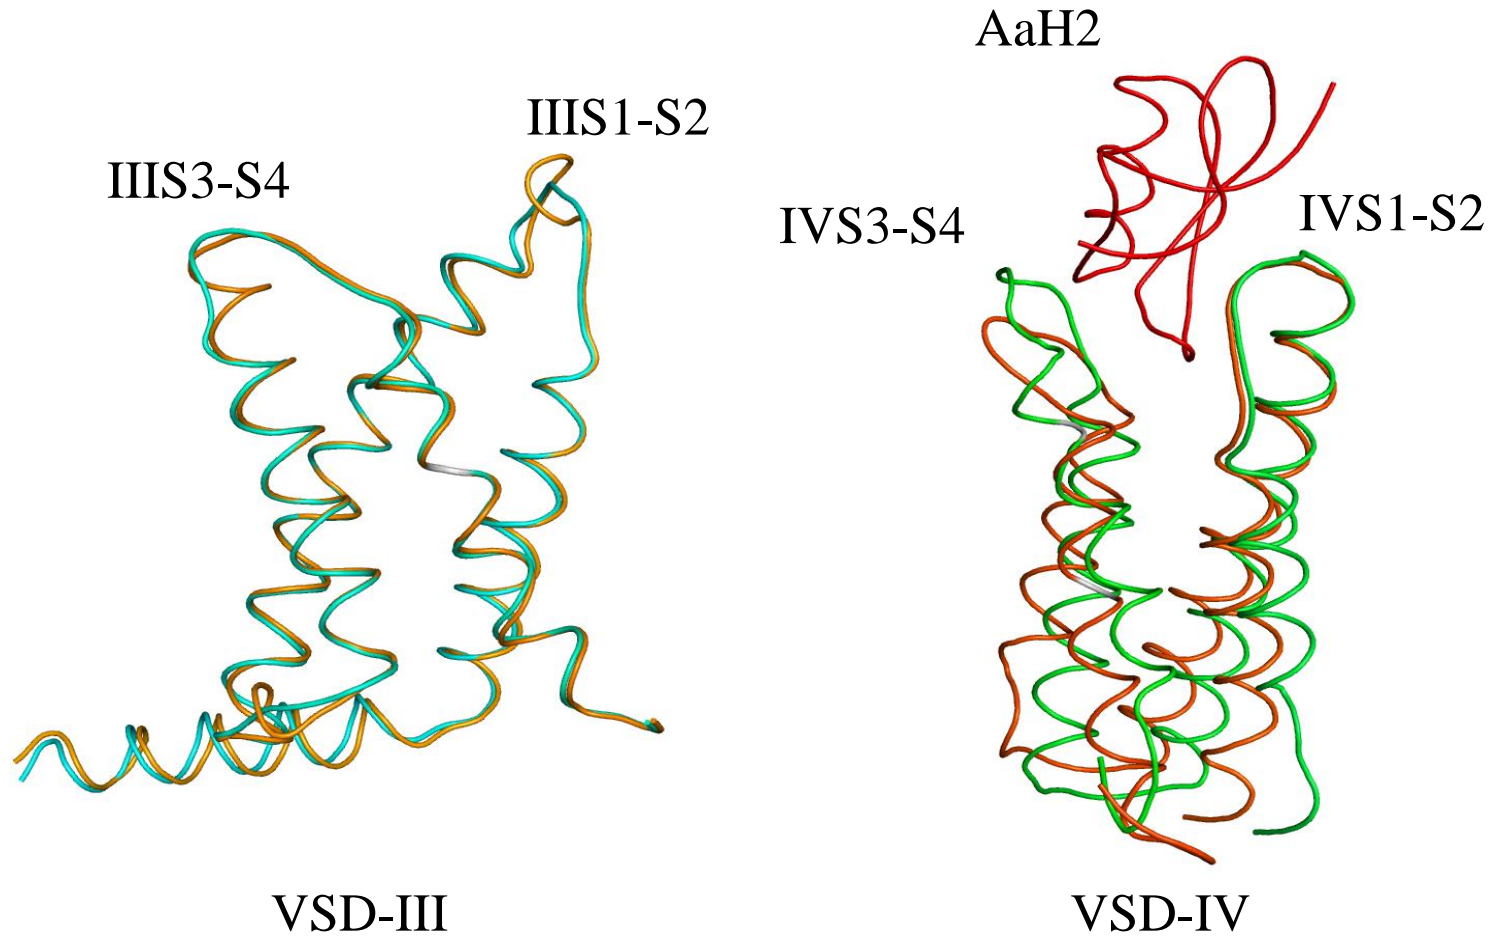

Figure S3A

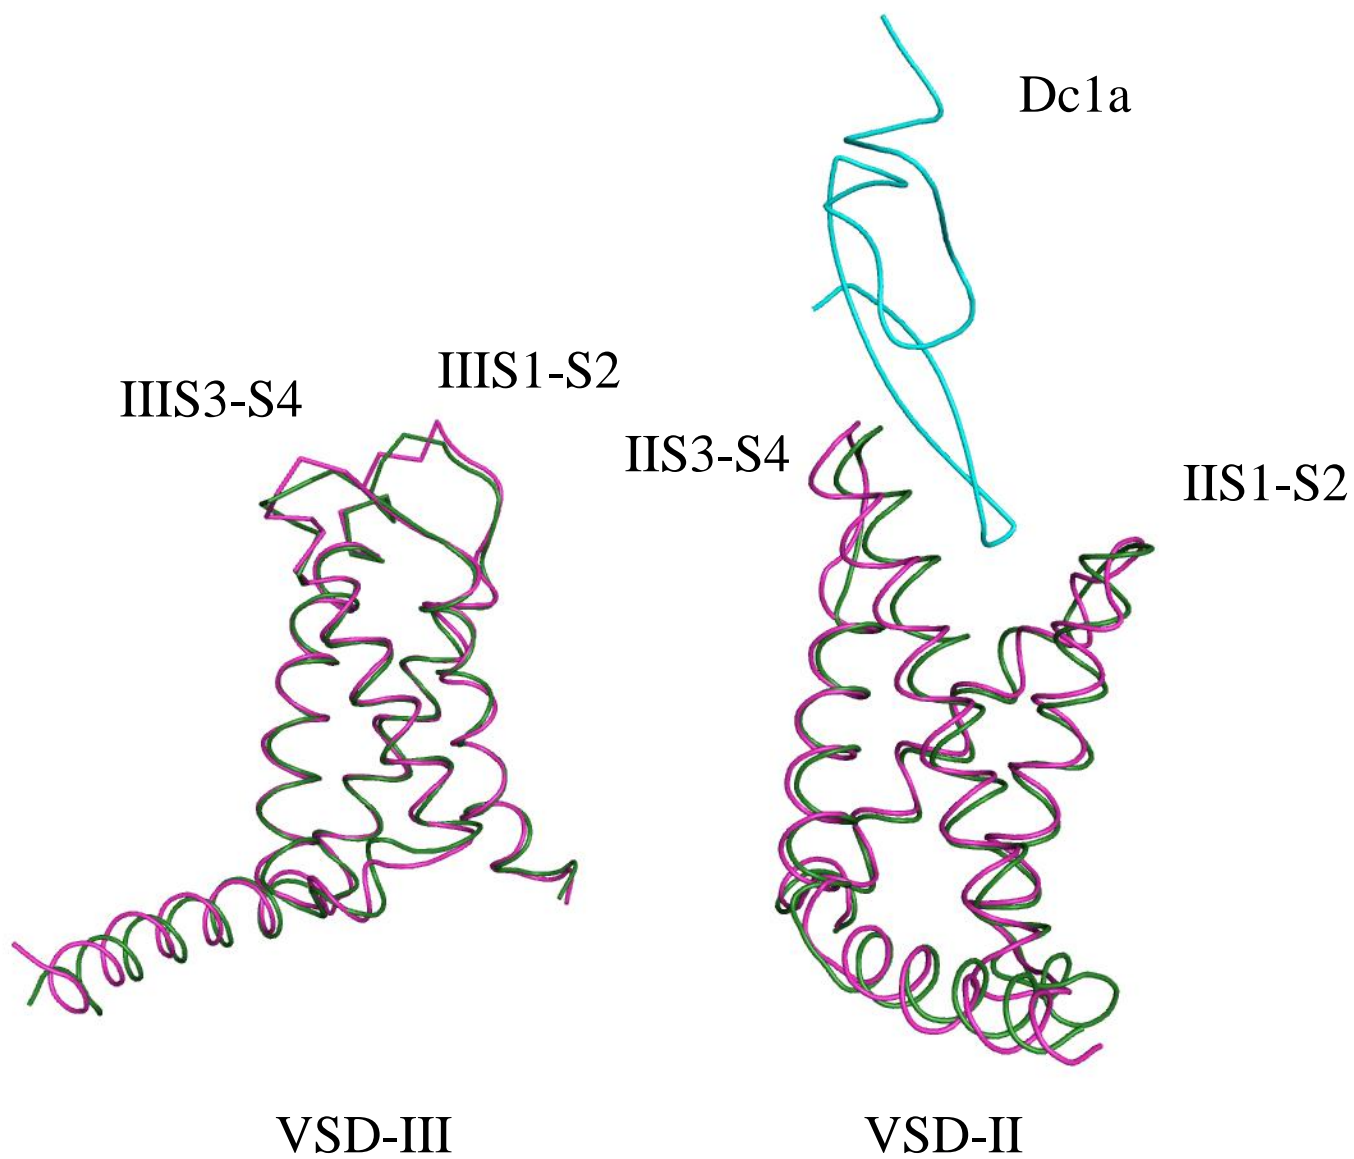

Figure S3B
